# Supplementary material
Source: publisher figshare collection journal article supplement (https://diabetesjournals.figshare.com/articles/dataset/_/20440074)

**Supplemental Table 1: Comparison of the samples at four fundus measurements (DPPOS year 01/05/11/16) as well as the full DPP cohort. Categorical variables are described as number of events (%), and continuous variables are described as mean (SD) and median (IQR). P-values are calculated using Pearson's Chi-square test or ANOVA comparing the samples at the four time points.**

|                                         | <b>Full</b>  | <b>Y01</b>  | <b>Y05</b>   | <b>Y11</b>   | <b>Y16</b>   | <b>p-value</b>      |
|-----------------------------------------|--------------|-------------|--------------|--------------|--------------|---------------------|
| <i>Sample size</i>                      | 3234         | 899         | 2128         | 2086         | 1563         |                     |
| <i>NHW</i>                              | 1768 (54.7%) | 482 (53.6%) | 1138 (53.5%) | 1090 (52.3%) | 779 (49.8%)  |                     |
| <i>African American</i>                 | 645 (19.9%)  | 197 (21.9%) | 425 (20.0%)  | 429 (20.6%)  | 325 (20.8%)  |                     |
| <i>Hispanic</i>                         | 508 (15.7%)  | 164 (18.2%) | 336 (15.8%)  | 326 (15.6%)  | 261 (16.7%)  | <.0001              |
| <i>Asian</i>                            | 142 (4.4%)   | 44 (4.9%)   | 102 (4.8%)   | 105 (5.0%)   | 78 (5.0%)    |                     |
| <i>American Indian</i>                  | 171 (5.3%)   | 12 (1.3%)   | 127 (6.0%)   | 136 (6.5%)   | 120 (7.7%)   |                     |
| <i>Male</i>                             | 1043 (32.3%) | 319 (35.5%) | 693 (32.6%)  | 653 (31.3%)  | 452 (28.9%)  |                     |
| <i>Female</i>                           | 2191 (67.7%) | 580 (64.5%) | 1435 (67.4%) | 1433 (68.7%) | 1111 (71.1%) | 0.013               |
| <i>ILS</i>                              | 1079 (33.4%) | 248 (27.6%) | 698 (32.8%)  | 678 (32.5%)  | 500 (32.0%)  |                     |
| <i>MET</i>                              | 1073 (33.2%) | 306 (34.0%) | 712 (33.5%)  | 703 (33.7%)  | 541 (34.6%)  | 0.0863              |
| <i>PLB</i>                              | 1082 (33.5%) | 345 (38.4%) | 718 (33.7%)  | 705 (33.8%)  | 522 (33.4%)  |                     |
| <i>NGR</i>                              | 674 (26.9%)  | 112 (13.1%) | 545 (27.7%)  | 513 (26.5%)  | 340 (23.8%)  |                     |
| <i>IGT</i>                              | 134 (5.4%)   | 25 (2.9%)   | 93 (4.7%)    | 86 (4.4%)    | 62 (4.3%)    | 0.1094 <sup>†</sup> |
| <i>T2D</i>                              | 1696 (67.7%) | 721 (84.0%) | 1326 (67.5%) | 1337 (69.1%) | 1026 (71.8%) |                     |
| <i>Never smoking</i>                    | 1897 (58.7%) | 510 (56.7%) | 1269 (59.6%) | 1268 (60.8%) | 980 (62.7%)  |                     |
| <i>Current smoker</i>                   | 226 (7.0%)   | 69 (7.7%)   | 133 (6.3%)   | 121 (5.8%)   | 87 (5.6%)    | 0.0611              |
| <i>Previous smoker</i>                  | 1111 (34.4%) | 320 (35.6%) | 726 (34.1%)  | 697 (33.4%)  | 496 (31.7%)  |                     |
| <i>Ever hypertension in follow-up</i>   | 2175 (86.6%) | 800 (90.5%) | 1833 (87.4%) | 1815 (88.1%) | 1365 (88.0%) | 0.0402              |
| <i>Hypertension at baseline</i>         | 679 (40.8%)  | 228 (47.0%) | 448 (39.5%)  | 404 (37.4%)  | 273 (34.2%)  | <.0001              |
| <i>Ever elevated lipid in follow-up</i> | 2042 (80.0%) | 744 (83.1%) | 1723 (81.2%) | 1715 (82.5%) | 1302 (83.4%) | 0.0401              |
| <i>Elevated lipid at baseline</i>       | 1138 (35.2%) | 324 (36.0%) | 770 (36.2%)  | 747 (35.8%)  | 543 (34.7%)  | 0.8846              |
| <i>Gestational diabetes</i>             | 353 (16.1%)  | 102 (17.6%) | 221 (15.4%)  | 229 (16.0%)  | 192 (17.3%)  | 0.6505              |
| <i>Ever pregnant</i>                    | 1869 (85.3%) | 494 (85.2%) | 1227 (85.5%) | 1224 (85.4%) | 960 (86.4%)  | 0.9303              |

|                                                |                   |                   |                  |                   |                   |        |
|------------------------------------------------|-------------------|-------------------|------------------|-------------------|-------------------|--------|
| Age at randomization                           | 50.61 (10.68)     | 51.61 (10.12)     | 51.34 (9.95)     | 50.38 (9.65)      | 48.96 (8.99)      | <.0001 |
| Average HbA1c (%)                              | 6.05 (0.71)       | 6.28 (0.81)       | 6.06 (0.71)      | 6.07 (0.73)       | 6.09 (0.75)       | <.0001 |
| Average fasting glucose (mg/dl)                | 113.9 (17.98)     | 120.9 (21.23)     | 114.0 (17.77)    | 114.6 (18.22)     | 114.8 (18.23)     | <.0001 |
| Average 2-hour glucose (mg/dl)                 | 162.8 (29.76)     | 174.9 (31.35)     | 162.7 (29.66)    | 163.0 (29.58)     | 163.0 (29.99)     | <.0001 |
| Average weight (kg)                            | 91.54 (19.62)     | 93.37 (20.53)     | 91.25 (19.25)    | 91.12 (19.03)     | 90.84 (18.30)     | 0.0809 |
| Average SBP (mmHg)                             | 121.7 (9.72)      | 122.7 (9.88)      | 121.6 (9.61)     | 121.4 (9.47)      | 120.7 (9.22)      | <.0001 |
| Average DBP (mmHg)                             | 74.03 (6.33)      | 74.22 (6.55)      | 73.82 (6.31)     | 73.74 (6.16)      | 73.86 (6.15)      | 0.4986 |
| 1/Insulin <sub>fasting</sub>                   | 0.05 (0.03)       | 0.05 (0.03)       | 0.05 (0.03)      | 0.05 (0.03)       | 0.05 (0.03)       | 0.0062 |
| ODI <sub>baseline</sub> *                      | 3831 (5280)       | 3706 (4991)       | 3776 (5496)      | 3788 (5504)       | 3770 (5269)       | 0.9464 |
|                                                | 2409              | 2400              | 2332             | 2389              | 2389              |        |
|                                                | (1186- 4747)      | (1151- 4536)      | (1153- 4701)     | (1180- 4717)      | (1219- 4649)      |        |
| HbA1c (%) <sub>baseline</sub>                  | 5.91 (0.50)       | 6.01 (0.52)       | 5.92 (0.49)      | 5.92 (0.50)       | 5.90 (0.49)       | <.0001 |
| Weight (kg) <sub>baseline</sub>                | 94.23 (20.26)     | 95.22 (20.37)     | 93.22 (19.27)    | 93.05 (19.22)     | 92.65 (18.60)     | 0.0243 |
| Systolic BP (mm Hg) <sub>baseline</sub>        | 123.7 (14.69)     | 125.1 (15.06)     | 123.2 (14.44)    | 122.8 (14.56)     | 121.7 (13.82)     | <.0001 |
| Diastolic BP (mm Hg) <sub>baseline</sub>       | 78.30 (9.29)      | 78.61 (9.62)      | 78.03 (9.30)     | 78.13 (9.28)      | 78.10 (9.28)      | 0.493  |
| BMI (kg/m <sup>2</sup> ) <sub>baseline</sub>   | 33.97 (6.69)      | 34.21 (6.70)      | 33.62 (6.36)     | 33.62 (6.39)      | 33.65 (6.28)      | 0.155  |
| Adiponectin (ug/mL) <sub>baseline</sub>        | 7.93 (3.47)       | 7.65 (3.31)       | 8.03 (3.55)      | 7.96 (3.45)       | 7.82 (3.22)       | 0.0717 |
| CIR <sub>baseline</sub>                        | 0.63 (0.43)       | 0.57 (0.37)       | 0.63 (0.43)      | 0.63 (0.43)       | 0.64 (0.43)       | 0.0001 |
| Fasting glucose (mg/dL) <sub>baseline</sub>    | 106.5 (8.32)      | 109.3 (9.12)      | 106.5 (8.37)     | 106.4 (8.39)      | 106.0 (8.34)      | <.0001 |
| 120-minute glucose (mg/dL) <sub>baseline</sub> | 164.6 (17.04)     | 168.1 (17.39)     | 164.5 (17.01)    | 164.6 (17.03)     | 164.6 (16.92)     | <.0001 |
| HOMA B-cell <sub>baseline</sub> *              | 225.7 (128.4)     | 225.8 (123.5)     | 224.6 (129.3)    | 223.9 (127.8)     | 225.4 (128.2)     | 0.9506 |
|                                                | 202.5             | 205.1             | 201.8            | 201.9             | 203.5             |        |
|                                                | (138.0-279.7)     | (138.8-286.1)     | (136.6-279.1)    | (137.1-277.0)     | (142.5-277.6)     |        |
| HOMA IR <sub>baseline</sub> *                  | 7.08 (4.19)       | 7.70 (4.43)       | 7.04 (4.17)      | 6.98 (4.12)       | 6.93 (4.01)       | <.0001 |
|                                                | 6.16 (4.22- 8.85) | 6.80 (4.61- 9.76) | 6.10 (4.19-8.79) | 6.04 (4.19- 8.79) | 6.04 (4.24- 8.76) |        |
| I30-I0/G30-G0 in (uU/mg) <sub>baseline</sub> * | 124.3 (92.89)     | 112.5 (79.83)     | 122.7 (92.23)    | 123.7 (91.92)     | 124.4 (91.22)     | 0.0031 |
|                                                | 104.0             | 93.50             | 102.3            | 104.3             | 103.7             |        |
|                                                | (66.70-157.6)     | (62.70-141.3)     | (66.70-157.1)    | (67.10-157.6)     | (67.90-160.0)     |        |
| ACR(mg/g) <sub>baseline</sub> *                | 13.91 (50.38)     | 15.64 (51.09)     | 13.61 (54.37)    | 14.27 (56.40)     | 14.44 (60.11)     | 0.9032 |

|                                    |                   |                   |                   |                   |                  |         |
|------------------------------------|-------------------|-------------------|-------------------|-------------------|------------------|---------|
|                                    | 5.51 (3.74- 9.74) | 5.40 (3.75- 9.64) | 5.43 (3.74- 9.49) | 5.44 (3.73- 9.48) | 5.41(3.73- 9.41) |         |
| hsCRP (mg/dL)_baseline*            | 0.59 (0.74)       | 0.59 (0.75)       | 0.157 (0.69)      | 0.59 (0.75)       | 0.60 (0.72)      | 0.9033  |
|                                    | 0.37 (0.17- 0.76) | 0.37 (0.17- 0.76) | 0.36 (0.17- 0.73) | 0.36 (0.17- 0.74) | 0.37(0.17- 0.76) |         |
| HDL-c (mg/dL) baseline             | 45.61 (11.78)     | 45.09 (11.47)     | 46.01 (12.18)     | 45.91 (12.04)     | 45.89 (11.79)    | 0.5343  |
| Total cholesterol (mg/dL)_baseline | 203.1 (36.36)     | 204.2 (34.96)     | 203.5 (35.68)     | 203.8 (35.65)     | 202.9 ( 34.73)   | 0.67    |
| LDL-c (mg/dL)_baseline             | 124.6 (32.85)     | 125.5 (32.66)     | 124.7 (32.50)     | 124.9 (32.38)     | 124.3 (31.63)    | 0.8892  |
| Triglycerides (mg/dL) _ baseline*  | 163.4 (95.86)     | 167.6 (95.56)     | 163.5 (96.82)     | 164.0 (96.95)     | 163.2 (99.20)    | 0.6617  |
|                                    | 141 (99-201)      | 145 (103-204)     | 142 (99-201)      | 142 (99-203)      | 141 (98-199)     |         |
| Duration (years) of T2D            | 6.77 (6.96)       | 10.46 (7.16)      | 7.02 (7.05)       | 7.52 (7.13)       | 8.32 (7.54)      | <0.0001 |

Categorical variables are number (%). Continuous variable are mean (SD) and, where indicated, median (IQR). Average values refers to the average of repeated measurements from the same participant during followup. Baseline values refer to the first measurement at beginning of DPP.

† p-value for years 5, 11 and 16 only; by design, more participants with T2D were selected for fundus photography at DPPOS year 1.

\* The first row reports mean (SD) values and the second row reports median (IQR).

**Supplemental Figure 1:** Prevalence of retinopathy at DPPOS year 16 by average systolic (SBP) (1A) and diastolic (DBP) (1B) blood pressure during followup. The blue line represents prevalence of retinopathy and the orange line represents the density of data over the range of average SBP or DBP.

1A

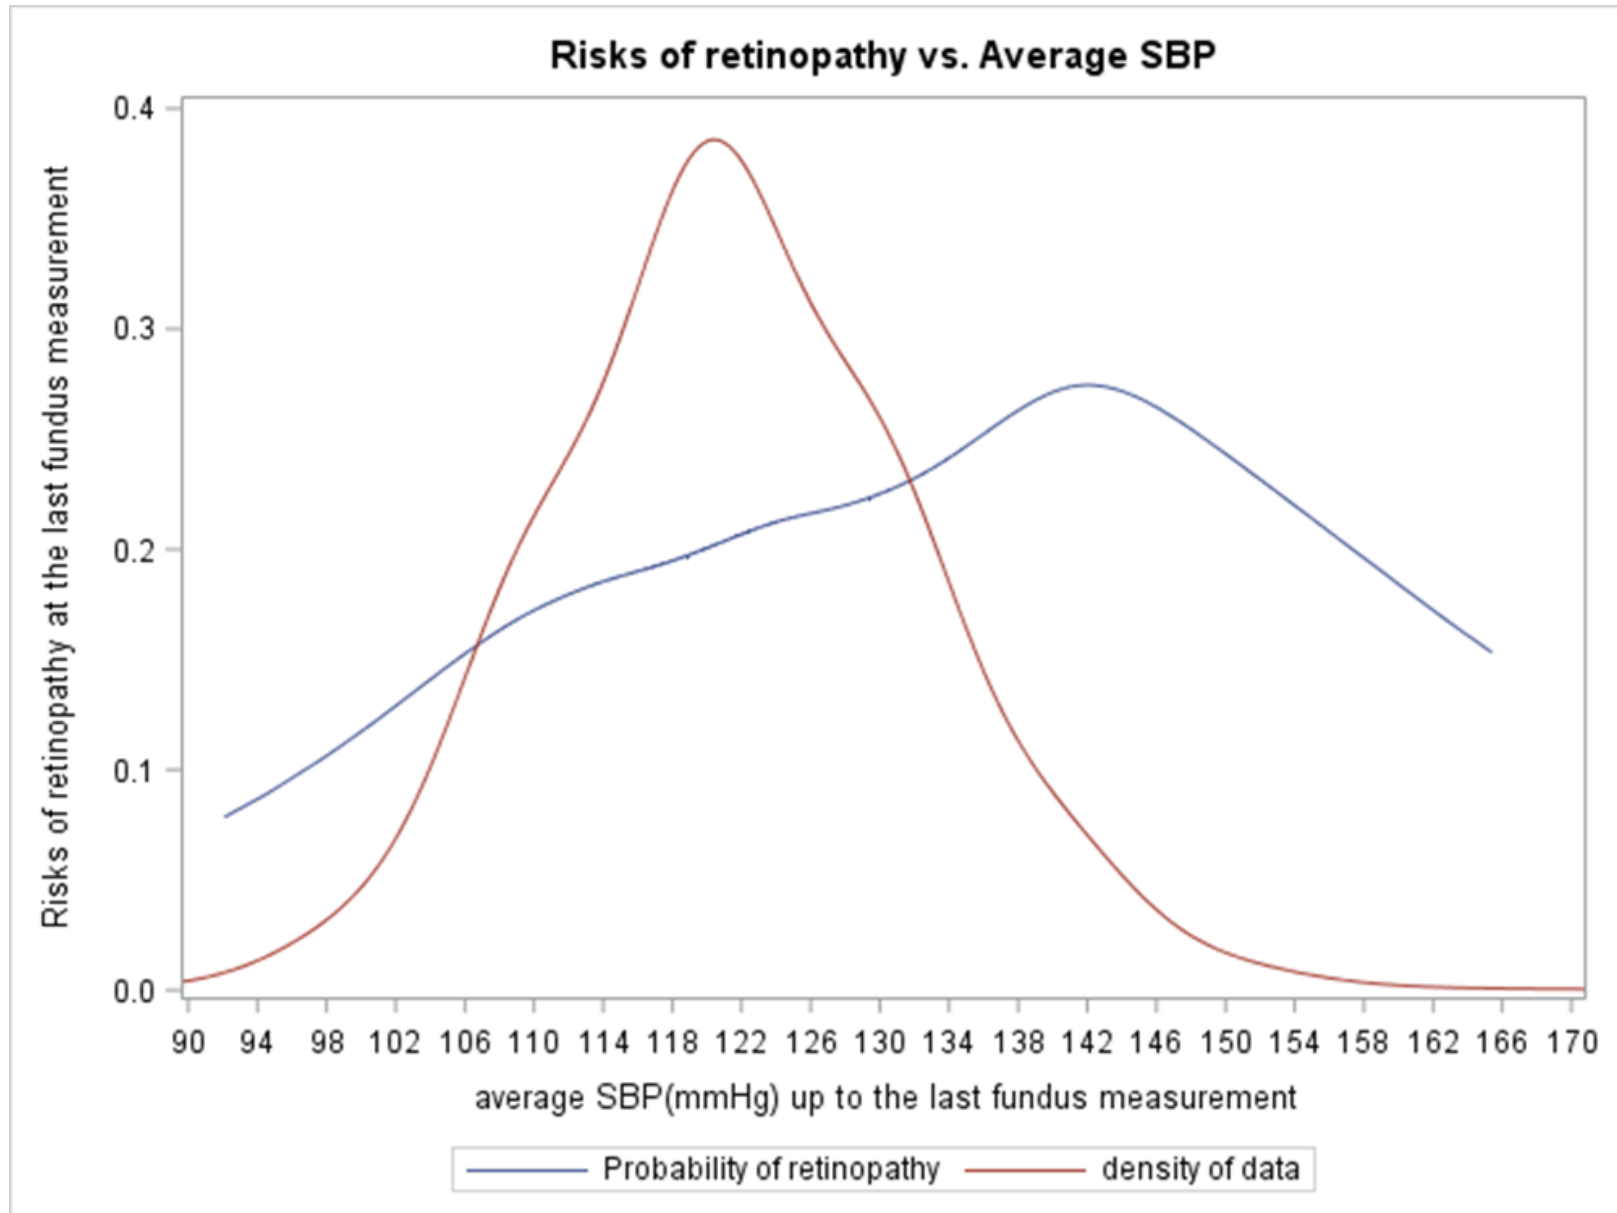

1B

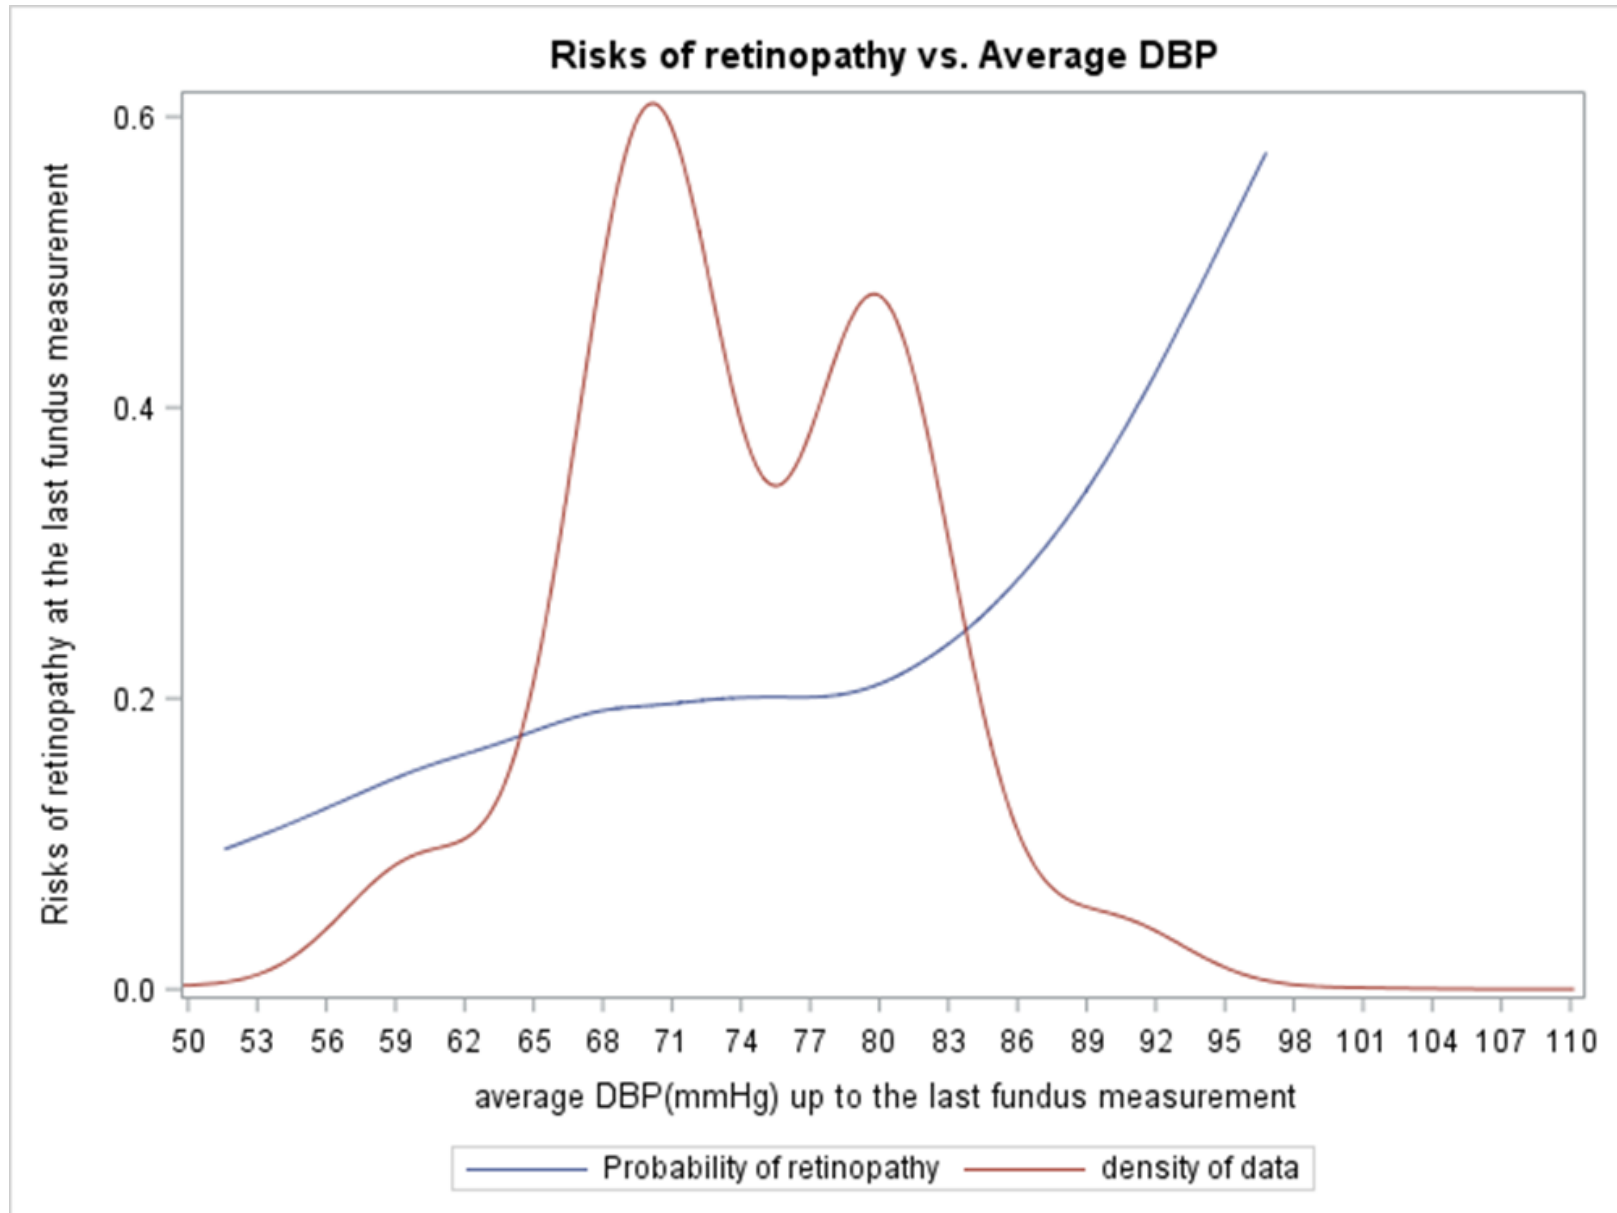

Supplement: Supplementary file 2 [file 1]
